# Supplementary material for: Assessing the Formation of Purine Lesions in Mitochondrial DNA of Cockayne Syndrome Cells
Source: MDPI journal article supplement (doi:10.3390/biom12111630), 2022-11-03
Supplement: s1 [file s1]

## Supplementary Material

### Assessing the Formation of Purine Lesions in Mitochondrial DNA of Cockayne Syndrome Cells

Chrysostomos Chatgililoglu \*, Marios G. Krokidis, Annalisa Masi, Sebastian Barata-Vallejo, Carla Ferreri, Barbara Pascucci and Mariarosaria D'Errico

\* Correspondence: chrys@isof.cnr.it

**Table S1:** Values of *t*-Test (Two-Sample Assuming Unequal Variances) by comparing lesions in mtDNA isolated from CSA and CSB cells (wt vs. defective).

|                      | 8-oxo-dG | 8-oxo-dA |
|----------------------|----------|----------|
| CS3BE-wtCSA vs CS3BE | 0.149    | 0.319    |
| CS1AN-wtCSB vs CS1AN | 0.011*   | 0.062    |

Statistically significant samples: \* ( $p < 0.05$ )

**Table S2.** The levels (lesions/10<sup>7</sup> nucleosides) of 8-oxo-dG and 8-oxo-dA in tDNA isolated from CSA and CSB (wt and defective) cells (Taken from reference [46]).

| tDNA        | 8-oxo-dG <sup>1</sup> | 8-oxo-dA <sup>1</sup> |
|-------------|-----------------------|-----------------------|
| CS3BE-wtCSA | 20.82 ± 1.44          | 5.49 ± 0.56*          |
| CS3BE       | 26.49 ± 3.03          | 7.49 ± 0.74*          |
| CS1AN-wtCSB | 26.78 ± 3.30          | 5.72 ± 0.28           |
| CS1AN       | 37.55 ± 1.19          | 6.18 ± 0.94           |

<sup>1</sup> The numbers represent the mean value (± standard deviation) of DNA lesions levels from the measurement of triplicate; statistical significance: \* ( $p = 0.040$ ) was observed between CS3BE-wtCSA and CS3BE cell samples.

**Table S3.** Values of *t*-Test (Two-Sample Assuming Unequal Variances) by comparing lesions in mtDNA isolated from CSA and CSB cells (wt vs. defective).

| 8-oxo-Pu             |           |
|----------------------|-----------|
| CS3BE-wtCSA vs CS3BE | 0.187     |
| CS1AN-wtCSB vs CS1AN | 0.0005*** |

Statistically significant samples: \*\*\* ( $p < 0.001$ )

**Table S4.** Total amount of 8-oxo-dG, 8-oxo-dA, 5'R-cdG, 5'R-cdA, 5'S-cdG and 5'S-cdA (lesions/10<sup>7</sup> nu) from the irradiation of N<sub>2</sub>O saturated tDNA or mtDNA (0.5 mg/mL) in aqueous solutions. <sup>1</sup>

| Sample | Dose, Gy | 8-oxo-dG        | 8-oxo-dA       | 5'R-cdG          | 5'R-cdA          | 5'S-cdG          | 5'S-cdA          |
|--------|----------|-----------------|----------------|------------------|------------------|------------------|------------------|
| tDNA   | 0        | 26.78 ± 3.30    | 5.72 ± 0.28    | 5.25 ± 0.53      | 6.28 ± 0.15      | 9.08 ± 0.68      | 2.23 ± 0.26      |
|        | 20       | 688.68 ± 39.23  | 93.17 ± 5.39   | 72.98 ± 2.56     | 92.58 ± 2.81     | 154.44 ± 14.95   | 49.92 ± 2.37     |
|        | 40       | 1433.93 ± 61.62 | 210.69 ± 14.55 | 166.14 ± 16.80   | 203.75 ± 10.57   | 292.53 ± 12.58   | 121.48 ± 10.00   |
| mtDNA  | 0        | 39.00 ± 0.18    | 8.08 ± 0.15    | N/D <sup>2</sup> | N/D <sup>2</sup> | N/D <sup>2</sup> | N/D <sup>2</sup> |
|        | 15       | 46.51 ± 7.09    | 11.45 ± 1.83   | 11.26 ± 1.19     | 6.10 ± 1.02      | 9.04 ± 0.61      | 5.00 ± 0.69      |
|        | 30       | 110.05 ± 10.40  | 29.55 ± 2.91   | 24.31 ± 3.58     | 18.17 ± 3.40     | 17.00 ± 1.22     | 8.31 ± 1.13      |
|        | 45       | 208.91 ± 19.00  | 43.18 ± 2.14   | 33.79 ± 2.51     | 34.05 ± 1.51     | 24.28 ± 4.12     | 18.55 ± 0.73     |

<sup>1</sup> The values are the mean value (± standard deviation) of DNA lesions levels from the measurement in triplicate. <sup>2</sup> N/D = non detected.

**Table S5.** Equation and R-squared value of Figure 5 plots

| tDNA     |                    |                | mtDNA    |                    |                |
|----------|--------------------|----------------|----------|--------------------|----------------|
| lesion   | equation           | R <sup>2</sup> | lesion   | equation           | R <sup>2</sup> |
| 8-oxo-dG | y = 35.17x + 12.88 | 0.998          | 8-oxo-dG | y = 3.821x + 15.12 | 0.886          |
| 8-oxo-dA | y = 5.124x + 0.704 | 0.992          | 8-oxo-dA | y = 0.822x + 4.551 | 0.944          |
| 5'R-cdG  | y = 4.022x + 1.01  | 0.991          | 5'R-cdG  | y = 0.762x + 0.177 | 0.996          |

|         |                      |       |  |         |                      |       |
|---------|----------------------|-------|--|---------|----------------------|-------|
| 5'R-cdA | $y = 4.936x + 2.137$ | 0.994 |  | 5'R-cdA | $y = 0.761x - 2.553$ | 0.964 |
| 5'S-cdG | $y = 7.086x + 10.29$ | 0.999 |  | 5'S-cdG | $y = 0.538x + 0.458$ | 0.997 |
| 5'S-cdA | $y = 2.981x - 1.749$ | 0.986 |  | 5'S-cdA | $y = 0.393x - 0.879$ | 0.942 |

**Table S6.** Total amount of cPu and 8-oxo-Pu (lesions/ $10^7$  nucleosides) in tDNA and mtDNA samples (taken from Table S4).

| Sample | Dose, Gy | 8-oxo-Pu            | cPu                |
|--------|----------|---------------------|--------------------|
| tDNA   | 0        | $32.49 \pm 3.04$    | $22.83 \pm 1.38$   |
|        | 20       | $781.85 \pm 44.62$  | $369.93 \pm 11.95$ |
|        | 40       | $1644.62 \pm 76.17$ | $783.90 \pm 3.65$  |
| mtDNA  | 0        | $47.08 \pm 0.20$    | 0                  |
|        | 15       | $57.95 \pm 5.26$    | $31.40 \pm 1.12$   |
|        | 30       | $139.60 \pm 13.31$  | $67.79 \pm 4.63$   |
|        | 45       | $252.08 \pm 21.13$  | $110.68 \pm 0.62$  |

**Table S7.** Diastereoisomeric ratios (5'R/5'S) for both cdG and cdA in tDNA and mtDNA samples (taken from Table S4).

| Sample | Dose, Gy | R/S cdG         | R/S cdA         |
|--------|----------|-----------------|-----------------|
| tDNA   | 0        | $0.58 \pm 0.03$ | $2.84 \pm 0.34$ |
|        | 20       | $0.48 \pm 0.06$ | $1.86 \pm 0.14$ |
|        | 40       | $0.57 \pm 0.08$ | $1.69 \pm 0.23$ |
| mtDNA  | 0        | 0               | 0               |
|        | 15       | $1.25 \pm 0.22$ | $1.22 \pm 0.04$ |
|        | 30       | $1.44 \pm 0.31$ | $2.23 \pm 0.71$ |
|        | 45       | $1.42 \pm 0.34$ | $1.84 \pm 0.01$ |
